# Supplementary material
Source: publisher figshare collection journal article supplement (https://asha.figshare.com/articles/dataset/_/6170222)
Supplement: Supplementary file 1 [file 1]

## Appendix G: Summary of Outcome Measures

| Outcome Measure                                                                             | Construct Assessed              |
|---------------------------------------------------------------------------------------------|---------------------------------|
| Primary Measures                                                                            |                                 |
| Metacognition in Reading Inventory (MIRI; Ehren, 2008)                                      | Metacognition in reading        |
| Inference Generation in Reading Test (IGIRT; Murza, 2011)                                   | Inference generation in reading |
| Watson-Glaser Critical Thinking Appraisal: Inference subtest (WGCTA; Watson & Glaser, 1964) | Inference generation in reading |
| Secondary Measures                                                                          |                                 |
| The Group Reading Assessment and Diagnostic Evaluation (GRADE; Williams, 2001a)             | General reading comprehension   |
| The Awareness of Social Inference Test (TASIT; McDonald, Flanagan, & Rollins, 2002)         | Social inference generation     |
