# Supplementary material
Source: publisher figshare collection journal article supplement (https://asha.figshare.com/articles/dataset/_/6170222)
Supplement: Supplementary file 2 [file 1]

### Appendix C: Act & Check Innovation Configuration Map: Process

| Key Elements                                                                                 | Ideal Implementation (3)                                                                                                                                                                                                                                                                      | In Process (1)                                                                                                                                                                                                      | No Implementation (0)                                                                   |
|----------------------------------------------------------------------------------------------|-----------------------------------------------------------------------------------------------------------------------------------------------------------------------------------------------------------------------------------------------------------------------------------------------|---------------------------------------------------------------------------------------------------------------------------------------------------------------------------------------------------------------------|-----------------------------------------------------------------------------------------|
| <ul style="list-style-type: none"> <li>Advance organizer (1–12) and review (2–12)</li> </ul> | The researcher provides an advance organizer to participants and reviews what occurred during the previous intervention session.                                                                                                                                                              | Researcher provides an advance organizer or reviews the previous intervention session but does not do both.                                                                                                         | Researcher does not provide an advance organizer or review.                             |
| <ul style="list-style-type: none"> <li>Purpose (1–12)</li> </ul>                             | The researcher explicitly provides participants with the purpose for the current session to build buy-in.                                                                                                                                                                                     | Although the researcher suggests the rationale of the session, she does not do so explicitly.                                                                                                                       | Researcher does not provide participants with the purpose for the intervention session. |
| <ul style="list-style-type: none"> <li>Description of behavior (1–12)</li> </ul>             | The researcher adequately describes the concept or behavior being taught.                                                                                                                                                                                                                     | The researcher describes the behavior being taught; however, the description is not explicit enough for all participants to understand.                                                                             | The researcher does not adequately describe the concept or behavior being taught.       |
| <ul style="list-style-type: none"> <li>Model of behavior (2 &amp; 5)</li> </ul>              | The researcher models the target behavior through a think-aloud activity.                                                                                                                                                                                                                     | The researcher models the target behavior but does not use the think-aloud process for each step of the behavior.                                                                                                   | The researcher does not model the target behavior through a think-aloud activity.       |
| <ul style="list-style-type: none"> <li>Scaffolded practice (2, 5, &amp; 7–10)</li> </ul>     | The researcher provides time in the session for participants to practice the target behavior. The researcher provides help to those participants who need it through the technique of scaffolding. Each passage is thoroughly discussed following completion of the task by each participant. | The researcher may not provide adequate time for practice or does not provide help through scaffolding to those participants who need it. A complete discussion of the passage and task also may not have occurred. | The researcher does not provide scaffolded practice.                                    |
| <ul style="list-style-type: none"> <li>Independent practice (7–10)</li> </ul>                | The researcher provides time in the session for participants to practice the target behavior independently. Each passage is thoroughly discussed following completion of the task by each participant.                                                                                        | The researcher may not provide adequate time for independent practice or does not discuss the passage and task following participants' completion.                                                                  | The researcher does not provide independent practice.                                   |
| <ul style="list-style-type: none"> <li>Post organizer (1–12)</li> </ul>                      | The researcher provides a post organizer to participants and discusses each activity of the completed session.                                                                                                                                                                                | The researcher may provide a post organizer but does not discuss each of the session's activities.                                                                                                                  | The researcher does not provide a post organizer.                                       |
