# Supplementary material
Source: publisher figshare collection journal article supplement (https://asha.figshare.com/articles/dataset/_/6170222)
Supplement: Supplementary file 4 [file 1]

## Appendix D: ACT & Check Strategy Lessons

| Lesson Number(s) | Activities                                                                                                                                                                 |
|------------------|----------------------------------------------------------------------------------------------------------------------------------------------------------------------------|
| Lesson 1         | Review pretest performance, establish buy-in of the intervention program, and briefly describe the ACT & Check Strategy.                                                   |
| Lesson 2         | Instruction in language underpinnings of inference generation and the inference categories most related to social inference.                                               |
| Lessons 3 & 4    | Continued instruction in inference categories and collaborative development of questions to ask as the participants read.                                                  |
| Lesson 5         | Instructor explanation and modeling of the ACT & Check Strategy in its complete form.                                                                                      |
| Lesson 6         | Verbal practice in memorizing the steps of the strategy and an oral quiz to confirm memorization.                                                                          |
| Lessons 7 & 8    | Small-group and individual practice using the strategy. Instructor available for feedback and to review each passage as a group.                                           |
| Lessons 9 & 10   | Increased independent practice using the strategy with both materials provided by the instructor and materials brought in by the participants                              |
| Lesson 11        | Confirmation of mastery of the ACT & Check Strategy.<br>Generalization of the strategy was discussed and participants made generalization commitments.                     |
| Lesson 12        | Generalization reinforcement with novel texts brought in by the instructor and by the participants. Reflection of experience and graphic organizer development and review. |
