# Supplementary material
Source: publisher figshare collection journal article supplement (https://asha.figshare.com/articles/dataset/_/6170222)
Supplement: Supplementary file 5 [file 1]

## Appendix A: Experimental Group Attendance

| Participant | # of Treatment<br>Sessions Attended | Total Treatment<br>Time in Minutes |
|-------------|-------------------------------------|------------------------------------|
| 1           | 9                                   | 540                                |
| 2*          | 7                                   | 420                                |
| 3           | 12                                  | 720                                |
| 4           | 11                                  | 630                                |
| 5           | 12                                  | 720                                |
| 6           | 12                                  | 690                                |
| 7**         | 9                                   | 540                                |
| 8           | 12                                  | 720                                |
| 9* **       | 9                                   | 540                                |
| 10          | 12                                  | 720                                |
| 11          | 12                                  | 720                                |
| 12          | 11                                  | 630                                |
| 13          | 12                                  | 720                                |
