# Supplementary material
Source: publisher figshare collection journal article supplement (https://asha.figshare.com/articles/dataset/_/6170222)
Supplement: Supplementary file 7 [file 1]

## Appendix F: Fidelity of Implementation Checklist

Date: \_\_\_\_\_ Group: \_\_\_\_\_ Lesson # \_\_\_\_\_

| Question                                                                                                                                      | Yes/No |
|-----------------------------------------------------------------------------------------------------------------------------------------------|--------|
| 1. Did the researcher provide an advance organizer of the session?                                                                            |        |
| 2. Did the researcher review the last sessions (only for Sessions 2–12)?                                                                      |        |
| 3. Did the researcher describe the purpose of the current session?                                                                            |        |
| 4. Did the researcher adequately describe the concept/behavior being taught?                                                                  |        |
| 5. Did the researcher model the concept/behavior being taught? (only for Sessions 2 & 5)                                                      |        |
| 6. Did the researcher provide scaffolded practice in which she helped any participants who needed help? (only for Sessions 2, 5, 7, 8, 9, 10) |        |
| 7. Did the researcher provide independent practice? (only for Sessions 7, 8, 9, 10)                                                           |        |
| 8. Did the researcher provide a post organizer?                                                                                               |        |
